# Supplementary material for: Dataset of Georeferenced Dams in South America (DDSA)
Source: Copernicus journal article supplement (doi:10.5194/essd-13-213-2021), 2021-02-02
Supplement: Supplementary file 1 [file essd-13-213-2021-supplement.pdf]

Supplement of Earth Syst. Sci. Data, 13, 213–229, 2021  
<https://doi.org/10.5194/essd-13-213-2021-supplement>  
© Author(s) 2021. This work is distributed under  
the Creative Commons Attribution 4.0 License.

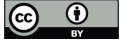

*Supplement of*

## **Dataset of Georeferenced Dams in South America (DDSA)**

**Bolivar Paredes-Beltran et al.**

*Correspondence to:* Bolivar Paredes-Beltran (be.paredes@alumnos.upm.es, be.paredes@uta.edu.ec)

The copyright of individual parts of the supplement might differ from the CC BY 4.0 License.

**SUPPLEMENTARY TABLE S1**  
**FUTURE DAMS IN SOUTH AMERICA**

| <b>COUNTRY</b> | <b>NAME</b>                   | <b>PHASE</b>    | <b>SOURCE</b>                     |
|----------------|-------------------------------|-----------------|-----------------------------------|
| Argentina      | Brazo Aña Cua                 | Projected       | FHReD, 2015                       |
| Argentina      | Cerro Rayoso                  | Projected       | FHReD, 2015                       |
| Argentina      | Chihuido 1                    | Projected       | FHReD, 2015                       |
| Argentina      | Condor Cliff                  | In Construction | FHReD, 2015                       |
| Argentina      | Corpus Christi                | Projected       | FHReD, 2015                       |
| Argentina      | El Tambolar                   | In Construction | FHReD, 2015                       |
| Argentina      | Garabi                        | Projected       | FHReD, 2015                       |
| Argentina      | Itacora-Itati                 | Projected       | FHReD, 2015                       |
| Argentina      | La Barrancosa                 | In Construction | FHReD, 2015                       |
| Argentina      | La Invernada                  | Projected       | FHReD, 2015                       |
| Argentina      | Los Blancos I                 | Projected       | FHReD, 2015                       |
| Argentina      | Los Blancos II                | Projected       | FHReD, 2015                       |
| Argentina      | Michihuao                     | Projected       | FHReD, 2015                       |
| Argentina      | Panambi                       | Projected       | FHReD, 2015                       |
| Argentina      | Piedra del Aguila (expansion) | Projected       | FHReD, 2015                       |
| Argentina      | Portezuelo del Viento         | Projected       | FHReD, 2015                       |
| Argentina      | Potrero del Clavillo          | Projected       | FHReD, 2015                       |
| Argentina      | Yacyreta (expansion)          | Projected       | FHReD, 2015                       |
| Bolivia        | Ambrosia                      | Projected       | FHReD, 2015; Almeida et al., 2019 |
| Bolivia        | Angosto Chepete               | Projected       | FHReD, 2015; Almeida et al., 2019 |
| Bolivia        | Angosto del Bala              | Projected       | FHReD, 2015; Almeida et al., 2019 |
| Bolivia        | Bacata                        | Projected       | FHReD, 2015; Almeida et al., 2019 |
| Bolivia        | Banda Azul                    | Projected       | FHReD, 2015; Almeida et al., 2019 |
| Bolivia        | Cañahuecal                    | Projected       | FHReD, 2015; Almeida et al., 2019 |
| Bolivia        | Cachuela Esperanza            | Projected       | FHReD, 2015; Almeida et al., 2019 |
| Bolivia        | Carrizal                      | Projected       | FHReD, 2015; Almeida et al., 2019 |
| Bolivia        | Guajará-Mirim                 | Projected       | FHReD, 2015; Almeida et al., 2019 |
| Bolivia        | Icona                         | Projected       | FHReD, 2015; Almeida et al., 2019 |
| Bolivia        | Ivirizu                       | In Construction | FHReD, 2015; Almeida et al., 2019 |
| Bolivia        | Jatun Pampa                   | Projected       | FHReD, 2015; Almeida et al., 2019 |
| Bolivia        | La Pesca                      | Projected       | FHReD, 2015; Almeida et al., 2019 |
| Bolivia        | Las Juntas                    | Projected       | FHReD, 2015; Almeida et al., 2019 |
| Bolivia        | Ocampo                        | Projected       | FHReD, 2015; Almeida et al., 2019 |
| Bolivia        | Pachalaca                     | Projected       | FHReD, 2015; Almeida et al., 2019 |
| Bolivia        | Palillada                     | In Construction | FHReD, 2015; Almeida et al., 2019 |
| Bolivia        | Peña Blanca                   | Projected       | FHReD, 2015; Almeida et al., 2019 |
| Bolivia        | Rio Grande - Rositas          | Projected       | FHReD, 2015; Almeida et al., 2019 |
| Bolivia        | Rio Madera                    | Projected       | FHReD, 2015; Almeida et al., 2019 |
| Bolivia        | Rositas                       | Projected       | FHReD, 2015                       |
| Bolivia        | Sehuencas                     | Projected       | FHReD, 2015; Almeida et al., 2019 |
| Bolivia        | Umapalca                      | In Construction | FHReD, 2015; Almeida et al., 2019 |
| Bolivia        | Seripona                      | Projected       | FHReD, 2015; Almeida et al., 2019 |
| Brazil         | 40 Ilhas                      | Projected       | FHReD, 2015; Almeida et al., 2019 |
| Brazil         | A1e6                          | Projected       | FHReD, 2015; Almeida et al., 2019 |
| Brazil         | A1e8                          | Projected       | FHReD, 2015; Almeida et al., 2019 |
| Brazil         | A1e9                          | Projected       | FHReD, 2015; Almeida et al., 2019 |
| Brazil         | A2e11                         | Projected       | FHReD, 2015; Almeida et al., 2019 |

| COUNTRY | NAME                             | PHASE           | SOURCE                                         |
|---------|----------------------------------|-----------------|------------------------------------------------|
| Brazil  | A2e12                            | Projected       | FHReD, 2015; Almeida et al., 2019              |
| Brazil  | A2e13                            | Projected       | FHReD, 2015; Almeida et al., 2019              |
| Brazil  | A2e14                            | Projected       | FHReD, 2015; Almeida et al., 2019              |
| Brazil  | A2e15                            | Projected       | FHReD, 2015; Almeida et al., 2019              |
| Brazil  | A2e16                            | Projected       | FHReD, 2015; Almeida et al., 2019              |
| Brazil  | A2e17                            | Projected       | FHReD, 2015; Almeida et al., 2019              |
| Brazil  | A2e18                            | Projected       | FHReD, 2015; Almeida et al., 2019              |
| Brazil  | A2e4                             | Projected       | FHReD, 2015; Almeida et al., 2019              |
| Brazil  | A2e5                             | Projected       | FHReD, 2015; Almeida et al., 2019              |
| Brazil  | A2e6                             | Projected       | FHReD, 2015; Almeida et al., 2019              |
| Brazil  | A2e7                             | Projected       | FHReD, 2015; Almeida et al., 2019              |
| Brazil  | A2e8                             | Projected       | FHReD, 2015; Almeida et al., 2019              |
| Brazil  | A2e9                             | Projected       | FHReD, 2015; Almeida et al., 2019              |
| Brazil  | A38pa100                         | Projected       | FHReD, 2015; Almeida et al., 2019              |
| Brazil  | A41pa008                         | Projected       | FHReD, 2015; Almeida et al., 2019              |
| Brazil  | A5 L10                           | Projected       | FHReD, 2015; Almeida et al., 2019              |
| Brazil  | A8b                              | Projected       | FHReD, 2015; Almeida et al., 2019              |
| Brazil  | Acaipe                           | Projected       | FHReD, 2015; Almeida et al., 2019              |
| Brazil  | Açungui 2E                       | Projected       | FHReD, 2015, ANEEL, 2020                       |
| Brazil  | Açungui 2F                       | Projected       | FHReD, 2015, ANEEL, 2020                       |
| Brazil  | Agua Boa                         | Projected       | FHReD, 2015, ANEEL, 2020; Almeida et al., 2019 |
| Brazil  | Águas da Serra                   | Projected       | FHReD, 2015, ANEEL, 2020                       |
| Brazil  | Aguas Lindas                     | Projected       | FHReD, 2015, ANEEL, 2020; Almeida et al., 2019 |
| Brazil  | Alcocaba                         | Projected       | FHReD, 2015, ANEEL, 2020; Almeida et al., 2019 |
| Brazil  | Alto Alegre                      | Projected       | FHReD, 2015, ANEEL, 2020                       |
| Brazil  | Alto Garcia                      | Projected       | FHReD, 2015, ANEEL, 2020                       |
| Brazil  | Alto Guaporé 2                   | Projected       | FHReD, 2015, ANEEL, 2020                       |
| Brazil  | Âmbar                            | In Construction | FHReD, 2015, ANEEL, 2020                       |
| Brazil  | Andorinha                        | Projected       | FHReD, 2015, ANEEL, 2020; Almeida et al., 2019 |
| Brazil  | Antônio Dias (Antiga Água Limpa) | Projected       | FHReD, 2015, ANEEL, 2020                       |
| Brazil  | Apertadinho                      | In Construction | FHReD, 2015, ANEEL, 2020                       |
| Brazil  | Apiaka Kayabi PEX-093            | Projected       | FHReD, 2015, ANEEL, 2020; Almeida et al., 2019 |
| Brazil  | Armando Ribeiro                  | In Construction | FHReD, 2015, ANEEL, 2020                       |
| Brazil  | Arn 026                          | Projected       | FHReD, 2015, ANEEL, 2020; Almeida et al., 2019 |
| Brazil  | Arrozeira Meyer                  | Projected       | FHReD, 2015, ANEEL, 2020                       |
| Brazil  | Aruana                           | Projected       | FHReD, 2015, ANEEL, 2020; Almeida et al., 2019 |
| Brazil  | Bacupari                         | Projected       | FHReD, 2015, ANEEL, 2020; Almeida et al., 2019 |
| Brazil  | Bacuri                           | Projected       | FHReD, 2015, ANEEL, 2020; Almeida et al., 2019 |
| Brazil  | Bananal                          | Projected       | FHReD, 2015, ANEEL, 2020; Almeida et al., 2019 |
| Brazil  | Barra Do Claro                   | Projected       | FHReD, 2015, ANEEL, 2020; Almeida et al., 2019 |
| Brazil  | Barra Do Gaviao                  | Projected       | FHReD, 2015, ANEEL, 2020; Almeida et al., 2019 |
| Brazil  | Barreiros                        | Projected       | FHReD, 2015, ANEEL, 2020; Almeida et al., 2019 |
| Brazil  | Bela Vista                       | Projected       | FHReD, 2015, ANEEL, 2020                       |
| Brazil  | Bela Vista                       | In Construction | FHReD, 2015, ANEEL, 2020                       |
| Brazil  | Bem Querer                       | Projected       | FHReD, 2015, ANEEL, 2020; Almeida et al., 2019 |
| Brazil  | Berimbau                         | Projected       | FHReD, 2015, ANEEL, 2020; Almeida et al., 2019 |
| Brazil  | Boa Vista                        | Projected       | FHReD, 2015, ANEEL, 2020                       |
| Brazil  | Bom Jesus                        | Projected       | FHReD, 2015, ANEEL, 2020                       |
| Brazil  | Braco Leste                      | Projected       | FHReD, 2015, ANEEL, 2020; Almeida et al., 2019 |

| COUNTRY | NAME                    | PHASE           | SOURCE                                         |
|---------|-------------------------|-----------------|------------------------------------------------|
| Brazil  | Braco Sul               | Projected       | FHReD, 2015, ANEEL, 2020; Almeida et al., 2019 |
| Brazil  | Brejaúba                | Projected       | FHReD, 2015, ANEEL, 2020                       |
| Brazil  | Buriti                  | Projected       | FHReD, 2015, ANEEL, 2020; Almeida et al., 2019 |
| Brazil  | Buritizal 1             | Projected       | FHReD, 2015, ANEEL, 2020; Almeida et al., 2019 |
| Brazil  | Buritizal 2             | Projected       | FHReD, 2015, ANEEL, 2020; Almeida et al., 2019 |
| Brazil  | Buritizal 3             | Projected       | FHReD, 2015, ANEEL, 2020; Almeida et al., 2019 |
| Brazil  | Cabeca de Boi           | Projected       | FHReD, 2015, ANEEL, 2020; Almeida et al., 2019 |
| Brazil  | Cabuí                   | Projected       | FHReD, 2015, ANEEL, 2020                       |
| Brazil  | Cachimbo                | Projected       | FHReD, 2015, ANEEL, 2020; Almeida et al., 2019 |
| Brazil  | Cachoeira Cinco Veados  | In Construction | FHReD, 2015, ANEEL, 2020                       |
| Brazil  | Cachoeira do Miné       | Projected       | FHReD, 2015, ANEEL, 2020                       |
| Brazil  | Cachoeira Agua Preta    | Projected       | FHReD, 2015, ANEEL, 2020; Almeida et al., 2019 |
| Brazil  | Cachoeira Cachimbo Alto | Projected       | FHReD, 2015, ANEEL, 2020; Almeida et al., 2019 |
| Brazil  | Cachoeira Caracol       | Projected       | FHReD, 2015, ANEEL, 2020; Almeida et al., 2019 |
| Brazil  | Cachoeira do Cambara    | Projected       | FHReD, 2015, ANEEL, 2020; Almeida et al., 2019 |
| Brazil  | Cachoeira do Codo       | Projected       | FHReD, 2015, ANEEL, 2020; Almeida et al., 2019 |
| Brazil  | Cachoeira do Ebrio      | Projected       | FHReD, 2015, ANEEL, 2020; Almeida et al., 2019 |
| Brazil  | Cachoeira do Meio       | Projected       | FHReD, 2015, ANEEL, 2020; Almeida et al., 2019 |
| Brazil  | Cachoeira Formosa       | Projected       | FHReD, 2015, ANEEL, 2020; Almeida et al., 2019 |
| Brazil  | Cachoeira Fortaleza     | Projected       | FHReD, 2015, ANEEL, 2020; Almeida et al., 2019 |
| Brazil  | Cachoeira Galinha       | Projected       | FHReD, 2015, ANEEL, 2020; Almeida et al., 2019 |
| Brazil  | Cachoeira Sao Jose      | Projected       | FHReD, 2015, ANEEL, 2020; Almeida et al., 2019 |
| Brazil  | Cachoeira Do Cai        | Projected       | FHReD, 2015, ANEEL, 2020; Almeida et al., 2019 |
| Brazil  | Cachoeira Dos Patos     | Projected       | FHReD, 2015, ANEEL, 2020; Almeida et al., 2019 |
| Brazil  | Cachoeirao              | Projected       | FHReD, 2015, ANEEL, 2020; Almeida et al., 2019 |
| Brazil  | Caldeirões              | Projected       | FHReD, 2015, ANEEL, 2020                       |
| Brazil  | Camberra 2              | Projected       | FHReD, 2015, ANEEL, 2020; Almeida et al., 2019 |
| Brazil  | Campo Belo              | Projected       | FHReD, 2015, ANEEL, 2020                       |
| Brazil  | Campos de Julio         | Projected       | FHReD, 2015, ANEEL, 2020; Almeida et al., 2019 |
| Brazil  | Candeia                 | Projected       | FHReD, 2015, ANEEL, 2020; Almeida et al., 2019 |
| Brazil  | Canoa Quebrada          | Projected       | FHReD, 2015, ANEEL, 2020; Almeida et al., 2019 |
| Brazil  | Carnauba                | Projected       | FHReD, 2015, ANEEL, 2020; Almeida et al., 2019 |
| Brazil  | Cascata                 | Projected       | FHReD, 2015, ANEEL, 2020                       |
| Brazil  | Castanhão               | In Construction | FHReD, 2015, ANEEL, 2020                       |
| Brazil  | Castanheira 2           | Projected       | FHReD, 2015, ANEEL, 2020; Almeida et al., 2019 |
| Brazil  | Castanheira AR N-120    | Projected       | FHReD, 2015, ANEEL, 2020; Almeida et al., 2019 |
| Brazil  | Cavernoso III           | Projected       | FHReD, 2015, ANEEL, 2020                       |
| Brazil  | Cavernoso IV            | Projected       | FHReD, 2015, ANEEL, 2020                       |
| Brazil  | Cedro                   | Projected       | FHReD, 2015, ANEEL, 2020; Almeida et al., 2019 |
| Brazil  | Cesar Filho             | Projected       | FHReD, 2015, ANEEL, 2020; Almeida et al., 2019 |
| Brazil  | Cerquinha II            | Projected       | FHReD, 2015, ANEEL, 2020                       |
| Brazil  | Cerquinha III           | Projected       | FHReD, 2015, ANEEL, 2020                       |
| Brazil  | Chacorao                | Projected       | FHReD, 2015, ANEEL, 2020; Almeida et al., 2019 |
| Brazil  | Cianorte                | Projected       | FHReD, 2015, ANEEL, 2020                       |
| Brazil  | Cinta Larga             | Projected       | FHReD, 2015, ANEEL, 2020; Almeida et al., 2019 |
| Brazil  | Cozumel 2               | Projected       | FHReD, 2015, ANEEL, 2020; Almeida et al., 2019 |
| Brazil  | Cristalina              | Projected       | FHReD, 2015, ANEEL, 2020; Almeida et al., 2019 |
| Brazil  | Diauarum                | Projected       | FHReD, 2015, ANEEL, 2020; Almeida et al., 2019 |
| Brazil  | Distancia               | Projected       | FHReD, 2015, ANEEL, 2020; Almeida et al., 2019 |

| COUNTRY | NAME                       | PHASE           | SOURCE                                         |
|---------|----------------------------|-----------------|------------------------------------------------|
| Brazil  | Divisa                     | Projected       | FHReD, 2015, ANEEL, 2020; Almeida et al., 2019 |
| Brazil  | Erikpatsa JRN-530          | Projected       | FHReD, 2015, ANEEL, 2020; Almeida et al., 2019 |
| Brazil  | Escondido JRN-277          | Projected       | FHReD, 2015, ANEEL, 2020; Almeida et al., 2019 |
| Brazil  | Esperanca                  | Projected       | FHReD, 2015, ANEEL, 2020; Almeida et al., 2019 |
| Brazil  | Faveiro                    | Projected       | FHReD, 2015, ANEEL, 2020; Almeida et al., 2019 |
| Brazil  | Fe Esperanca               | Projected       | FHReD, 2015, ANEEL, 2020; Almeida et al., 2019 |
| Brazil  | Formiga                    | Projected       | FHReD, 2015, ANEEL, 2020; Almeida et al., 2019 |
| Brazil  | Foz Formiga Baixo JUI-029b | Projected       | FHReD, 2015, ANEEL, 2020; Almeida et al., 2019 |
| Brazil  | Foz Sacre PPG-147          | Projected       | FHReD, 2015, ANEEL, 2020; Almeida et al., 2019 |
| Brazil  | Foz Do Apiacas             | Projected       | FHReD, 2015, ANEEL, 2020; Almeida et al., 2019 |
| Brazil  | Frieira                    | Projected       | FHReD, 2015, ANEEL, 2020; Almeida et al., 2019 |
| Brazil  | Clairto Zonta              | Projected       | FHReD, 2015, ANEEL, 2020                       |
| Brazil  | Cobre Km 19                | Projected       | FHReD, 2015, ANEEL, 2020                       |
| Brazil  | Comodoro                   | Projected       | FHReD, 2015, ANEEL, 2020                       |
| Brazil  | Confluência                | Projected       | FHReD, 2015, ANEEL, 2020                       |
| Brazil  | Córrego Fundo              | Projected       | FHReD, 2015, ANEEL, 2020                       |
| Brazil  | Couro do Cervo             | Projected       | FHReD, 2015, ANEEL, 2020                       |
| Brazil  | Dias                       | Projected       | FHReD, 2015, ANEEL, 2020                       |
| Brazil  | Dois Saltos                | In Construction | FHReD, 2015, ANEEL, 2020                       |
| Brazil  | Emas Nova                  | Projected       | FHReD, 2015, ANEEL, 2020                       |
| Brazil  | Estação Indaial            | Projected       | FHReD, 2015, ANEEL, 2020                       |
| Brazil  | Estivadinho 3              | Projected       | FHReD, 2015, ANEEL, 2020                       |
| Brazil  | Fazenda do Salto           | In Construction | FHReD, 2015, ANEEL, 2020                       |
| Brazil  | Fazenda Santana            | Projected       | FHReD, 2015, ANEEL, 2020                       |
| Brazil  | Forquilha                  | In Construction | FHReD, 2015, ANEEL, 2020                       |
| Brazil  | Forquilha IV               | In Construction | FHReD, 2015, ANEEL, 2020                       |
| Brazil  | Fortaleza                  | Projected       | FHReD, 2015, ANEEL, 2020                       |
| Brazil  | Foz da Anta                | Projected       | FHReD, 2015, ANEEL, 2020                       |
| Brazil  | Foz do Cedro (Antiga A1E8) | Projected       | FHReD, 2015, ANEEL, 2020                       |
| Brazil  | Foz do Estrela             | In Construction | FHReD, 2015, ANEEL, 2020                       |
| Brazil  | Foz do Santana             | Projected       | FHReD, 2015, ANEEL, 2020                       |
| Brazil  | Galera                     | Projected       | FHReD, 2015, ANEEL, 2020; Almeida et al., 2019 |
| Brazil  | Garca                      | Projected       | FHReD, 2015, ANEEL, 2020; Almeida et al., 2019 |
| Brazil  | Gaucha Do Norte            | Projected       | FHReD, 2015, ANEEL, 2020; Almeida et al., 2019 |
| Brazil  | Girassol                   | Projected       | FHReD, 2015, ANEEL, 2020; Almeida et al., 2019 |
| Brazil  | Guapuruvu                  | Projected       | FHReD, 2015, ANEEL, 2020; Almeida et al., 2019 |
| Brazil  | Iara                       | Projected       | FHReD, 2015, ANEEL, 2020; Almeida et al., 2019 |
| Brazil  | Ilha Sao Pedro             | Projected       | FHReD, 2015, ANEEL, 2020; Almeida et al., 2019 |
| Brazil  | Ilha Tres Quedas           | Projected       | FHReD, 2015, ANEEL, 2020; Almeida et al., 2019 |
| Brazil  | Ilhotas                    | Projected       | FHReD, 2015, ANEEL, 2020; Almeida et al., 2019 |
| Brazil  | Inferninho                 | Projected       | FHReD, 2015, ANEEL, 2020; Almeida et al., 2019 |
| Brazil  | Ipiranga                   | Projected       | FHReD, 2015, ANEEL, 2020; Almeida et al., 2019 |
| Brazil  | Itacare                    | Projected       | FHReD, 2015, ANEEL, 2020; Almeida et al., 2019 |
| Brazil  | Jaborandi                  | Projected       | FHReD, 2015, ANEEL, 2020; Almeida et al., 2019 |
| Brazil  | Jaboticabal                | Projected       | FHReD, 2015, ANEEL, 2020; Almeida et al., 2019 |
| Brazil  | Jaburu                     | Projected       | FHReD, 2015, ANEEL, 2020; Almeida et al., 2019 |
| Brazil  | Jamaxim                    | Projected       | FHReD, 2015, ANEEL, 2020; Almeida et al., 2019 |
| Brazil  | Jardim de Ouro             | Projected       | FHReD, 2015, ANEEL, 2020; Almeida et al., 2019 |
| Brazil  | Jatoba                     | Projected       | FHReD, 2015, ANEEL, 2020; Almeida et al., 2019 |

| COUNTRY | NAME               | PHASE           | SOURCE                                         |
|---------|--------------------|-----------------|------------------------------------------------|
| Brazil  | Jeriva             | Projected       | FHReD, 2015, ANEEL, 2020; Almeida et al., 2019 |
| Brazil  | Gameleira          | Projected       | FHReD, 2015, ANEEL, 2020                       |
| Brazil  | Guaraú             | Projected       | FHReD, 2015, ANEEL, 2020                       |
| Brazil  | Ibituruna          | Projected       | FHReD, 2015, ANEEL, 2020                       |
| Brazil  | Invernadinha       | In Construction | FHReD, 2015, ANEEL, 2020                       |
| Brazil  | Itaocara I         | Projected       | FHReD, 2015, ANEEL, 2020                       |
| Brazil  | Itiquira III       | Projected       | FHReD, 2015, ANEEL, 2020                       |
| Brazil  | Jaspe              | Projected       | FHReD, 2015, ANEEL, 2020                       |
| Brazil  | Jesuíta            | Projected       | FHReD, 2015, ANEEL, 2020; Almeida et al., 2019 |
| Brazil  | Ji Parana          | Projected       | FHReD, 2015, ANEEL, 2020; Almeida et al., 2019 |
| Brazil  | Joacaba            | Projected       | FHReD, 2015, ANEEL, 2020; Almeida et al., 2019 |
| Brazil  | Jrn 577            | Projected       | FHReD, 2015, ANEEL, 2020; Almeida et al., 2019 |
| Brazil  | Jrn 720            | Projected       | FHReD, 2015, ANEEL, 2020; Almeida et al., 2019 |
| Brazil  | Jui 048            | Projected       | FHReD, 2015, ANEEL, 2020; Almeida et al., 2019 |
| Brazil  | Jui 117            | Projected       | FHReD, 2015, ANEEL, 2020; Almeida et al., 2019 |
| Brazil  | Juina 1            | Projected       | FHReD, 2015, ANEEL, 2020; Almeida et al., 2019 |
| Brazil  | Juina 2            | Projected       | FHReD, 2015, ANEEL, 2020; Almeida et al., 2019 |
| Brazil  | Juina 3            | Projected       | FHReD, 2015, ANEEL, 2020; Almeida et al., 2019 |
| Brazil  | Juruena            | Projected       | FHReD, 2015, ANEEL, 2020; Almeida et al., 2019 |
| Brazil  | Jurureba           | Projected       | FHReD, 2015, ANEEL, 2020; Almeida et al., 2019 |
| Brazil  | Jutuarama          | Projected       | FHReD, 2015, ANEEL, 2020; Almeida et al., 2019 |
| Brazil  | Kabiara            | Projected       | FHReD, 2015, ANEEL, 2020; Almeida et al., 2019 |
| Brazil  | Kona               | Projected       | FHReD, 2015, ANEEL, 2020; Almeida et al., 2019 |
| Brazil  | Lagoa Rasa         | Projected       | FHReD, 2015, ANEEL, 2020; Almeida et al., 2019 |
| Brazil  | Macauba            | Projected       | FHReD, 2015, ANEEL, 2020; Almeida et al., 2019 |
| Brazil  | Juba IV            | Projected       | FHReD, 2015, ANEEL, 2020                       |
| Brazil  | Jubinha II         | Projected       | FHReD, 2015, ANEEL, 2020                       |
| Brazil  | Jubinha III        | Projected       | FHReD, 2015, ANEEL, 2020                       |
| Brazil  | Lacerdópolis       | Projected       | FHReD, 2015, ANEEL, 2020                       |
| Brazil  | Linha Aparecida    | Projected       | FHReD, 2015, ANEEL, 2020                       |
| Brazil  | Linha Jacinto      | Projected       | FHReD, 2015, ANEEL, 2020                       |
| Brazil  | Linha Rica         | In Construction | FHReD, 2015, ANEEL, 2020                       |
| Brazil  | Lucia Cherobim     | Projected       | FHReD, 2015, ANEEL, 2020                       |
| Brazil  | Macacos            | In Construction | FHReD, 2015, ANEEL, 2020                       |
| Brazil  | Machadinho I       | Projected       | FHReD, 2015, ANEEL, 2020; Almeida et al., 2019 |
| Brazil  | Magessi            | Projected       | FHReD, 2015, ANEEL, 2020; Almeida et al., 2019 |
| Brazil  | Manaca             | Projected       | FHReD, 2015, ANEEL, 2020; Almeida et al., 2019 |
| Brazil  | Mangabeira         | Projected       | FHReD, 2015, ANEEL, 2020; Almeida et al., 2019 |
| Brazil  | Mangaratiba        | Projected       | FHReD, 2015, ANEEL, 2020; Almeida et al., 2019 |
| Brazil  | Martelo            | Projected       | FHReD, 2015, ANEEL, 2020; Almeida et al., 2019 |
| Brazil  | Mangueira de Pedra | Projected       | FHReD, 2015, ANEEL, 2020                       |
| Brazil  | Mantovilis         | In Construction | FHReD, 2015, ANEEL, 2020                       |
| Brazil  | Manuel Alves       | In Construction | FHReD, 2015, ANEEL, 2020                       |
| Brazil  | Matrinchã          | Projected       | FHReD, 2015, ANEEL, 2020; Almeida et al., 2019 |
| Brazil  | Membeca 1          | Projected       | FHReD, 2015, ANEEL, 2020; Almeida et al., 2019 |
| Brazil  | Membeca 2          | Projected       | FHReD, 2015, ANEEL, 2020; Almeida et al., 2019 |
| Brazil  | Membeca 4          | Projected       | FHReD, 2015, ANEEL, 2020; Almeida et al., 2019 |
| Brazil  | Membeca 5          | Projected       | FHReD, 2015, ANEEL, 2020; Almeida et al., 2019 |
| Brazil  | Membeca 6          | Projected       | FHReD, 2015, ANEEL, 2020; Almeida et al., 2019 |

| COUNTRY | NAME                    | PHASE           | SOURCE                                         |
|---------|-------------------------|-----------------|------------------------------------------------|
| Brazil  | Membeca 8               | Projected       | FHReD, 2015, ANEEL, 2020; Almeida et al., 2019 |
| Brazil  | Membeca 9               | Projected       | FHReD, 2015, ANEEL, 2020; Almeida et al., 2019 |
| Brazil  | Minacu                  | Projected       | FHReD, 2015, ANEEL, 2020; Almeida et al., 2019 |
| Brazil  | Miriti                  | Projected       | FHReD, 2015, ANEEL, 2020; Almeida et al., 2019 |
| Brazil  | Mocoto                  | Projected       | FHReD, 2015, ANEEL, 2020; Almeida et al., 2019 |
| Brazil  | Mogno                   | Projected       | FHReD, 2015, ANEEL, 2020; Almeida et al., 2019 |
| Brazil  | Mu2                     | Projected       | FHReD, 2015, ANEEL, 2020; Almeida et al., 2019 |
| Brazil  | Mu3                     | Projected       | FHReD, 2015, ANEEL, 2020; Almeida et al., 2019 |
| Brazil  | Mutamba                 | Projected       | FHReD, 2015, ANEEL, 2020; Almeida et al., 2019 |
| Brazil  | Nambikwara JUI-008      | Projected       | FHReD, 2015, ANEEL, 2020; Almeida et al., 2019 |
| Brazil  | Nordeste                | Projected       | FHReD, 2015, ANEEL, 2020; Almeida et al., 2019 |
| Brazil  | Nossa Senhora Gracias 1 | Projected       | FHReD, 2015, ANEEL, 2020; Almeida et al., 2019 |
| Brazil  | Melo Viana              | Projected       | FHReD, 2015, ANEEL, 2020                       |
| Brazil  | Monjolo                 | Projected       | FHReD, 2015, ANEEL, 2020                       |
| Brazil  | Monte Cuco              | Projected       | FHReD, 2015, ANEEL, 2020                       |
| Brazil  | Muçungo                 | Projected       | FHReD, 2015, ANEEL, 2020                       |
| Brazil  | Mutum I                 | Projected       | FHReD, 2015, ANEEL, 2020                       |
| Brazil  | Nhandu                  | In Construction | FHReD, 2015, ANEEL, 2020                       |
| Brazil  | Nova Guaporé            | In Construction | FHReD, 2015, ANEEL, 2020; Almeida et al., 2019 |
| Brazil  | Nova Mutum              | Projected       | FHReD, 2015, ANEEL, 2020; Almeida et al., 2019 |
| Brazil  | Paiagua                 | Projected       | FHReD, 2015, ANEEL, 2020; Almeida et al., 2019 |
| Brazil  | Pancada Grande          | Projected       | FHReD, 2015, ANEEL, 2020; Almeida et al., 2019 |
| Brazil  | Paranatinga 1           | Projected       | FHReD, 2015, ANEEL, 2020; Almeida et al., 2019 |
| Brazil  | Paredao A               | Projected       | FHReD, 2015, ANEEL, 2020; Almeida et al., 2019 |
| Brazil  | Paredao M1              | Projected       | FHReD, 2015, ANEEL, 2020; Almeida et al., 2019 |
| Brazil  | Patos                   | Projected       | FHReD, 2015, ANEEL, 2020; Almeida et al., 2019 |
| Brazil  | Pch J3                  | Projected       | FHReD, 2015, ANEEL, 2020; Almeida et al., 2019 |
| Brazil  | Pch J4                  | Projected       | FHReD, 2015, ANEEL, 2020; Almeida et al., 2019 |
| Brazil  | Pedra Branca            | Projected       | FHReD, 2015, ANEEL, 2020; Almeida et al., 2019 |
| Brazil  | Perdidos                | Projected       | FHReD, 2015, ANEEL, 2020; Almeida et al., 2019 |
| Brazil  | Pescara 2               | Projected       | FHReD, 2015, ANEEL, 2020; Almeida et al., 2019 |
| Brazil  | Pitombeira              | Projected       | FHReD, 2015, ANEEL, 2020; Almeida et al., 2019 |
| Brazil  | Ppg 115                 | Projected       | FHReD, 2015, ANEEL, 2020; Almeida et al., 2019 |
| Brazil  | Prainha                 | Projected       | FHReD, 2015, ANEEL, 2020; Almeida et al., 2019 |
| Brazil  | Precipicio              | Projected       | FHReD, 2015, ANEEL, 2020; Almeida et al., 2019 |
| Brazil  | Pucon 2                 | Projected       | FHReD, 2015, ANEEL, 2020; Almeida et al., 2019 |
| Brazil  | Quebra Remo             | Projected       | FHReD, 2015, ANEEL, 2020; Almeida et al., 2019 |
| Brazil  | Ribeirao Agua Verde 1   | Projected       | FHReD, 2015, ANEEL, 2020; Almeida et al., 2019 |
| Brazil  | Ribeirao Agua Verde 2   | Projected       | FHReD, 2015, ANEEL, 2020; Almeida et al., 2019 |
| Brazil  | Ribeirao Agua Verde 3   | Projected       | FHReD, 2015, ANEEL, 2020; Almeida et al., 2019 |
| Brazil  | Ribeirao Agua Verde 4   | Projected       | FHReD, 2015, ANEEL, 2020; Almeida et al., 2019 |
| Brazil  | Roncador                | Projected       | FHReD, 2015, ANEEL, 2020; Almeida et al., 2019 |
| Brazil  | Rondon 1                | Projected       | FHReD, 2015, ANEEL, 2020; Almeida et al., 2019 |
| Brazil  | S1a                     | Projected       | FHReD, 2015, ANEEL, 2020; Almeida et al., 2019 |
| Brazil  | S4a                     | Projected       | FHReD, 2015, ANEEL, 2020; Almeida et al., 2019 |
| Brazil  | Sac 014                 | Projected       | FHReD, 2015, ANEEL, 2020; Almeida et al., 2019 |
| Brazil  | Sacre 1                 | Projected       | FHReD, 2015, ANEEL, 2020; Almeida et al., 2019 |
| Brazil  | Sacre 3                 | Projected       | FHReD, 2015, ANEEL, 2020; Almeida et al., 2019 |
| Brazil  | Sacre 4                 | Projected       | FHReD, 2015, ANEEL, 2020; Almeida et al., 2019 |

| COUNTRY | NAME                         | PHASE           | SOURCE                                         |
|---------|------------------------------|-----------------|------------------------------------------------|
| Brazil  | Sacre 5                      | Projected       | FHReD, 2015, ANEEL, 2020; Almeida et al., 2019 |
| Brazil  | Salto Apiacas                | Projected       | FHReD, 2015, ANEEL, 2020; Almeida et al., 2019 |
| Brazil  | Salto Augusto Baixo JRN-234b | Projected       | FHReD, 2015, ANEEL, 2020; Almeida et al., 2019 |
| Brazil  | Salto Paraiso                | Projected       | FHReD, 2015, ANEEL, 2020; Almeida et al., 2019 |
| Brazil  | Samua                        | Projected       | FHReD, 2015, ANEEL, 2020; Almeida et al., 2019 |
| Brazil  | San 020                      | Projected       | FHReD, 2015, ANEEL, 2020; Almeida et al., 2019 |
| Brazil  | Santa Cruz                   | Projected       | FHReD, 2015, ANEEL, 2020; Almeida et al., 2019 |
| Brazil  | Santo Antonio 1              | Projected       | FHReD, 2015, ANEEL, 2020; Almeida et al., 2019 |
| Brazil  | Santo Antonio 2              | Projected       | FHReD, 2015, ANEEL, 2020; Almeida et al., 2019 |
| Brazil  | Santo Antonio 3              | Projected       | FHReD, 2015, ANEEL, 2020; Almeida et al., 2019 |
| Brazil  | Santo Antonio 4              | Projected       | FHReD, 2015, ANEEL, 2020; Almeida et al., 2019 |
| Brazil  | Santo Antonio 5              | Projected       | FHReD, 2015, ANEEL, 2020; Almeida et al., 2019 |
| Brazil  | Sao Joao Da Barra 2          | Projected       | FHReD, 2015, ANEEL, 2020; Almeida et al., 2019 |
| Brazil  | Sao Paulo De Pimenta Bueno   | Projected       | FHReD, 2015, ANEEL, 2020; Almeida et al., 2019 |
| Brazil  | Sao Simao Alto JRN-117a      | Projected       | FHReD, 2015, ANEEL, 2020; Almeida et al., 2019 |
| Brazil  | Sao Luiz do Tapajos          | Projected       | FHReD, 2015, ANEEL, 2020; Almeida et al., 2019 |
| Brazil  | Sapopema                     | Projected       | FHReD, 2015, ANEEL, 2020; Almeida et al., 2019 |
| Brazil  | Serrinha                     | Projected       | FHReD, 2015, ANEEL, 2020; Almeida et al., 2019 |
| Brazil  | Sibipuruna                   | Projected       | FHReD, 2015, ANEEL, 2020; Almeida et al., 2019 |
| Brazil  | Sinop                        | Projected       | FHReD, 2015, ANEEL, 2020; Almeida et al., 2019 |
| Brazil  | Sororoca                     | Projected       | FHReD, 2015, ANEEL, 2020; Almeida et al., 2019 |
| Brazil  | Sumauma                      | Projected       | FHReD, 2015, ANEEL, 2020; Almeida et al., 2019 |
| Brazil  | Sumauma 2                    | Projected       | FHReD, 2015, ANEEL, 2020; Almeida et al., 2019 |
| Brazil  | Sumidouro                    | Projected       | FHReD, 2015, ANEEL, 2020; Almeida et al., 2019 |
| Brazil  | Tabajara                     | Projected       | FHReD, 2015, ANEEL, 2020; Almeida et al., 2019 |
| Brazil  | Taboca 1                     | Projected       | FHReD, 2015, ANEEL, 2020; Almeida et al., 2019 |
| Brazil  | Taboca 2                     | Projected       | FHReD, 2015, ANEEL, 2020; Almeida et al., 2019 |
| Brazil  | Tinga                        | Projected       | FHReD, 2015, ANEEL, 2020; Almeida et al., 2019 |
| Brazil  | Toure                        | Projected       | FHReD, 2015, ANEEL, 2020; Almeida et al., 2019 |
| Brazil  | Trairao                      | Projected       | FHReD, 2015, ANEEL, 2020; Almeida et al., 2019 |
| Brazil  | Travessao                    | Projected       | FHReD, 2015, ANEEL, 2020; Almeida et al., 2019 |
| Brazil  | Tucuma JRN-466               | Projected       | FHReD, 2015, ANEEL, 2020; Almeida et al., 2019 |
| Brazil  | Uhe J1                       | Projected       | FHReD, 2015, ANEEL, 2020; Almeida et al., 2019 |
| Brazil  | Urubu                        | Projected       | FHReD, 2015, ANEEL, 2020; Almeida et al., 2019 |
| Brazil  | Urucupata                    | Projected       | FHReD, 2015, ANEEL, 2020; Almeida et al., 2019 |
| Brazil  | Nova Trento                  | Projected       | FHReD, 2015, ANEEL, 2020                       |
| Brazil  | Oswaldo Vicintin             | Projected       | FHReD, 2015, ANEEL, 2020                       |
| Brazil  | Palma                        | Projected       | FHReD, 2015, ANEEL, 2020                       |
| Brazil  | Piarucum                     | In Construction | FHReD, 2015, ANEEL, 2020                       |
| Brazil  | Pira                         | Projected       | FHReD, 2015, ANEEL, 2020                       |
| Brazil  | Pirapetinga                  | Projected       | FHReD, 2015, ANEEL, 2020                       |
| Brazil  | Pontal                       | Projected       | FHReD, 2015, ANEEL, 2020                       |
| Brazil  | Ponte Branca                 | In Construction | FHReD, 2015, ANEEL, 2020                       |
| Brazil  | Prainha                      | Projected       | FHReD, 2015, ANEEL, 2020                       |
| Brazil  | Presente de Deus             | Projected       | FHReD, 2015, ANEEL, 2020                       |
| Brazil  | Primavera do Rio Turvo       | Projected       | FHReD, 2015, ANEEL, 2020                       |
| Brazil  | Rabo do Macaco               | In Construction | FHReD, 2015, ANEEL, 2020                       |
| Brazil  | Rincão São Miguel            | In Construction | FHReD, 2015, ANEEL, 2020                       |
| Brazil  | Rio Claro (Antiga Perdidos)  | In Construction | FHReD, 2015, ANEEL, 2020                       |



| COUNTRY | NAME                   | PHASE           | SOURCE                   |
|---------|------------------------|-----------------|--------------------------|
| Brazil  | Rio Natal I            | Projected       | FHReD, 2015, ANEEL, 2020 |
| Brazil  | Rochedo                | In Construction | FHReD, 2015, ANEEL, 2020 |
| Brazil  | Rodeio                 | Projected       | FHReD, 2015, ANEEL, 2020 |
| Brazil  | Salgado                | Projected       | FHReD, 2015, ANEEL, 2020 |
| Brazil  | Salto Cafesoca         | Projected       | FHReD, 2015, ANEEL, 2020 |
| Brazil  | Salto do Guassupi      | In Construction | FHReD, 2015, ANEEL, 2020 |
| Brazil  | Santa Branca           | Projected       | FHReD, 2015, ANEEL, 2020 |
| Brazil  | Santa Luzia            | Projected       | FHReD, 2015, ANEEL, 2020 |
| Brazil  | Santa Mônica           | Projected       | FHReD, 2015, ANEEL, 2020 |
| Brazil  | Santa Rosa             | Projected       | FHReD, 2015, ANEEL, 2020 |
| Brazil  | Santa Rosa I           | Projected       | FHReD, 2015, ANEEL, 2020 |
| Brazil  | Santo Antônio do Jacuí | Projected       | FHReD, 2015, ANEEL, 2020 |
| Brazil  | São Bartolomeu         | Projected       | FHReD, 2015, ANEEL, 2020 |
| Brazil  | São Carlos             | In Construction | FHReD, 2015, ANEEL, 2020 |
| Brazil  | São Francisco          | Projected       | FHReD, 2015, ANEEL, 2020 |
| Brazil  | São Jerônimo           | Projected       | FHReD, 2015, ANEEL, 2020 |
| Brazil  | São João II            | Projected       | FHReD, 2015, ANEEL, 2020 |
| Brazil  | São Luiz               | In Construction | FHReD, 2015, ANEEL, 2020 |
| Brazil  | São Roque              | In Construction | FHReD, 2015, ANEEL, 2020 |
| Brazil  | Sede II                | In Construction | FHReD, 2015, ANEEL, 2020 |
| Brazil  | Silveira II            | Projected       | FHReD, 2015, ANEEL, 2020 |
| Brazil  | Silveira III           | Projected       | FHReD, 2015, ANEEL, 2020 |
| Brazil  | Sumidouro              | Projected       | FHReD, 2015, ANEEL, 2020 |
| Brazil  | Taguá                  | In Construction | FHReD, 2015, ANEEL, 2020 |
| Brazil  | Tamanduá               | Projected       | FHReD, 2015, ANEEL, 2020 |
| Brazil  | Timbuí Seco            | Projected       | FHReD, 2015, ANEEL, 2020 |
| Brazil  | Tio Hugo               | Projected       | FHReD, 2015, ANEEL, 2020 |
| Brazil  | Touros IV              | Projected       | FHReD, 2015, ANEEL, 2020 |
| Brazil  | Três Capões Novo       | Projected       | FHReD, 2015, ANEEL, 2020 |
| Brazil  | Urubu                  | Projected       | FHReD, 2015, ANEEL, 2020 |
| Brazil  | Verde 02 Baixo         | Projected       | FHReD, 2015, ANEEL, 2020 |
| Brazil  | Verde 03               | Projected       | FHReD, 2015, ANEEL, 2020 |
| Chile   | Alfalfal II            | In Construction | FHReD, 2015              |
| Chile   | Choshuenco             | Projected       | FHReD, 2015              |
| Chile   | Condor                 | Projected       | FHReD, 2015              |
| Chile   | El Canelo              | Projected       | FHReD, 2015              |
| Chile   | Espejo Tarapaca        | Projected       | FHReD, 2015              |
| Chile   | Frontera               | Projected       | FHReD, 2015              |
| Chile   | Hidromocho             | In Construction | FHReD, 2015              |
| Chile   | La Confianza           | In Construction | FHReD, 2015              |
| Chile   | La Punilla             | In Construction | FHReD, 2015              |
| Chile   | Las Lajas              | In Construction | FHReD, 2015              |
| Chile   | Los Cóndores           | In Construction | FHReD, 2015              |
| Chile   | Los Lagos              | Projected       | FHReD, 2015              |
| Chile   | Los Lagos              | In Construction | FHReD, 2015              |
| Chile   | Neltume                | Projected       | FHReD, 2015              |
| Chile   | Neltume                | Projected       | FHReD, 2015              |
| Chile   | Nido de Aguilas        | In Construction | FHReD, 2015              |
| Chile   | Osorno                 | Projected       | FHReD, 2015              |

| COUNTRY  | NAME                     | PHASE           | SOURCE                            |
|----------|--------------------------|-----------------|-----------------------------------|
| Chile    | Osorno                   | Projected       | FHReD, 2015                       |
| Chile    | Pasada Ñuble             | In Construction | FHReD, 2015                       |
| Chile    | Pinar                    | In Construction | FHReD, 2015                       |
| Chile    | Quilleco                 | Projected       | FHReD, 2015                       |
| Chile    | San Pedro                | Projected       | FHReD, 2015                       |
| Chile    | Teno                     | Projected       | FHReD, 2015                       |
| Chile    | Trupan                   | In Construction | FHReD, 2015                       |
| Colombia | Andaqui                  | Projected       | FHReD, 2015; Almeida et al., 2019 |
| Colombia | Mitu                     | Projected       | FHReD, 2015; Almeida et al., 2019 |
| Colombia | Guayas Puerto Rico       | Projected       | FHReD, 2015                       |
| Colombia | Huila Cauca              | Projected       | FHReD, 2015                       |
| Colombia | La Paz                   | Projected       | FHReD, 2015                       |
| Colombia | Miel II                  | Projected       | FHReD, 2015                       |
| Colombia | Talasa                   | Projected       | FHReD, 2015                       |
| Ecuador  | Abitagua                 | Projected       | FHReD, 2015; Almeida et al., 2019 |
| Ecuador  | Ambato                   | Projected       | FHReD, 2015; Almeida et al., 2019 |
| Ecuador  | Catachi                  | Projected       | FHReD, 2015; Almeida et al., 2019 |
| Ecuador  | Cedroyacu                | Projected       | FHReD, 2015; Almeida et al., 2019 |
| Ecuador  | Chingual                 | Projected       | FHReD, 2015; Almeida et al., 2019 |
| Ecuador  | Cosanga                  | Projected       | FHReD, 2015; Almeida et al., 2019 |
| Ecuador  | Cuyes                    | Projected       | FHReD, 2015; Almeida et al., 2019 |
| Ecuador  | El Cav±Aro               | Projected       | FHReD, 2015; Almeida et al., 2019 |
| Ecuador  | El Retorno               | Projected       | FHReD, 2015; Almeida et al., 2019 |
| Ecuador  | Huarhualla               | Projected       | FHReD, 2015; Almeida et al., 2019 |
| Ecuador  | Isimanchi                | Projected       | FHReD, 2015; Almeida et al., 2019 |
| Ecuador  | Jondachi Sardinias       | Projected       | FHReD, 2015; Almeida et al., 2019 |
| Ecuador  | La Barquilla             | Projected       | FHReD, 2015; Almeida et al., 2019 |
| Ecuador  | La Merced De Jondachi    | Projected       | FHReD, 2015; Almeida et al., 2019 |
| Ecuador  | La Rinconada             | Projected       | FHReD, 2015; Almeida et al., 2019 |
| Ecuador  | Langoa                   | Projected       | FHReD, 2015; Almeida et al., 2019 |
| Ecuador  | Las Cidras               | Projected       | FHReD, 2015; Almeida et al., 2019 |
| Ecuador  | Lligua Muyo              | Projected       | FHReD, 2015; Almeida et al., 2019 |
| Ecuador  | Negro                    | Projected       | FHReD, 2015; Almeida et al., 2019 |
| Ecuador  | Numbala                  | Projected       | FHReD, 2015; Almeida et al., 2019 |
| Ecuador  | Palanda                  | Projected       | FHReD, 2015; Almeida et al., 2019 |
| Ecuador  | Palanda 2                | Projected       | FHReD, 2015; Almeida et al., 2019 |
| Ecuador  | Papallacta Blanco Grande | Projected       | FHReD, 2015; Almeida et al., 2019 |
| Ecuador  | Alluriquín               | In Construction | FHReD, 2015                       |
| Ecuador  | Caluma Pasagua           | Projected       | FHReD, 2015                       |
| Ecuador  | Chalpi Grande            | Projected       | FHReD, 2015                       |
| Ecuador  | Chespi - Palma Real      | Projected       | FHReD, 2015                       |
| Ecuador  | Chinambí                 | Projected       | FHReD, 2015                       |
| Ecuador  | Chontal                  | Projected       | FHReD, 2015                       |
| Ecuador  | Chorrillos               | In Construction | FHReD, 2015                       |
| Ecuador  | El Laurel                | Projected       | FHReD, 2015                       |
| Ecuador  | El Salto                 | In Construction | FHReD, 2015                       |
| Ecuador  | Huapamala                | Projected       | FHReD, 2015                       |
| Ecuador  | Ibarra Fugua             | Projected       | FHReD, 2015                       |
| Ecuador  | Infiernillo              | Projected       | FHReD, 2015                       |

| COUNTRY  | NAME                    | PHASE           | SOURCE                            |
|----------|-------------------------|-----------------|-----------------------------------|
| Ecuador  | La Magdalena            | Projected       | FHReD, 2015                       |
| Ecuador  | La Union                | Projected       | FHReD, 2015                       |
| Ecuador  | Maravilla               | Projected       | FHReD, 2015                       |
| Ecuador  | Mazar Dudas Dudas       | Projected       | FHReD, 2015                       |
| Ecuador  | Mazar Dudas San Antonio | In Construction | FHReD, 2015                       |
| Ecuador  | Paute-Cardenillo        | Projected       | FHReD, 2015; Almeida et al., 2019 |
| Ecuador  | Piatua                  | In Construction | FHReD, 2015; Almeida et al., 2019 |
| Ecuador  | Pilaló 3                | Projected       | FHReD, 2015                       |
| Ecuador  | Quijos                  | In Construction | FHReD, 2015; Almeida et al., 2019 |
| Ecuador  | San Mateo               | Projected       | FHReD, 2015; Almeida et al., 2019 |
| Ecuador  | Santiago G10            | Projected       | FHReD, 2015; Almeida et al., 2019 |
| Ecuador  | Santiago G11            | Projected       | FHReD, 2015; Almeida et al., 2019 |
| Ecuador  | Santiago G8             | Projected       | FHReD, 2015; Almeida et al., 2019 |
| Ecuador  | Santiago G9             | Projected       | FHReD, 2015; Almeida et al., 2019 |
| Ecuador  | Sabanilla               | In Construction | FHReD, 2015                       |
| Ecuador  | San José de Minas       | In Construction | FHReD, 2015                       |
| Ecuador  | Santiago                | Projected       | FHReD, 2015                       |
| Ecuador  | Sarapullo               | In Construction | FHReD, 2015                       |
| Ecuador  | Sardinas                | Projected       | FHReD, 2015; Almeida et al., 2019 |
| Ecuador  | Soldados Yanuncay       | Projected       | FHReD, 2015                       |
| Ecuador  | Tigreurco               | Projected       | FHReD, 2015                       |
| Ecuador  | Toachi-Pilatón          | In Construction | FHReD, 2015                       |
| Ecuador  | Ulba                    | Projected       | FHReD, 2015                       |
| Ecuador  | Sucua                   | Projected       | FHReD, 2015; Almeida et al., 2019 |
| Ecuador  | Valladolid              | Projected       | FHReD, 2015; Almeida et al., 2019 |
| Ecuador  | Verdeyacu Chico         | Projected       | FHReD, 2015; Almeida et al., 2019 |
| Ecuador  | Victoria-2              | Projected       | FHReD, 2015; Almeida et al., 2019 |
| Paraguay | Acaray III              | Projected       | FHReD, 2015                       |
| Paraguay | Carapá                  | Projected       | FHReD, 2015                       |
| Paraguay | Nacunday                | Projected       | FHReD, 2015                       |
| Paraguay | Río Paraguay A          | Projected       | FHReD, 2015                       |
| Paraguay | Río Paraguay B          | Projected       | FHReD, 2015                       |
| Peru     | Ayna                    | Projected       | FHReD, 2015; Almeida et al., 2019 |
| Peru     | Balsas                  | Projected       | FHReD, 2015; Almeida et al., 2019 |
| Peru     | Alto Piura              | Projected       | FHReD, 2015                       |
| Peru     | Acco                    | Projected       | FHReD, 2015                       |
| Peru     | Angostura               | Projected       | FHReD, 2015                       |
| Peru     | Apurimac                | Projected       | FHReD, 2015                       |
| Peru     | Belo Horizonte          | Projected       | FHReD, 2015; Almeida et al., 2019 |
| Peru     | Bolivar                 | Projected       | FHReD, 2015; Almeida et al., 2019 |
| Peru     | Ccollpani               | Projected       | FHReD, 2015; Almeida et al., 2019 |
| Peru     | Centauro                | Projected       | FHReD, 2015; Almeida et al., 2019 |
| Peru     | Cazaderos               | Projected       | FHReD, 2015                       |
| Peru     | Chadin II               | Projected       | FHReD, 2015; Almeida et al., 2019 |
| Peru     | Chilia                  | Projected       | FHReD, 2015; Almeida et al., 2019 |
| Peru     | Chontayacu Alto         | Projected       | FHReD, 2015; Almeida et al., 2019 |
| Peru     | Chontayacu Bajo         | Projected       | FHReD, 2015; Almeida et al., 2019 |
| Peru     | Chusgon                 | Projected       | FHReD, 2015; Almeida et al., 2019 |
| Peru     | Colpa                   | Projected       | FHReD, 2015; Almeida et al., 2019 |

| COUNTRY | NAME                       | PHASE           | SOURCE                            |
|---------|----------------------------|-----------------|-----------------------------------|
| Peru    | Cumba4                     | Projected       | FHReD, 2015; Almeida et al., 2019 |
| Peru    | Cuquipampa                 | Projected       | FHReD, 2015; Almeida et al., 2019 |
| Peru    | Curibamba1 Uchub           | Projected       | FHReD, 2015; Almeida et al., 2019 |
| Peru    | Curibamba2 Comas           | Projected       | FHReD, 2015; Almeida et al., 2019 |
| Peru    | Del Norte                  | Projected       | FHReD, 2015; Almeida et al., 2019 |
| Peru    | El Caño                    | Projected       | FHReD, 2015; Almeida et al., 2019 |
| Peru    | Escurrebraga               | Projected       | FHReD, 2015; Almeida et al., 2019 |
| Peru    | Garibaldi                  | Projected       | FHReD, 2015; Almeida et al., 2019 |
| Peru    | Huallaga I                 | Projected       | FHReD, 2015; Almeida et al., 2019 |
| Peru    | Huasahuasi 1               | Projected       | FHReD, 2015; Almeida et al., 2019 |
| Peru    | Huasahuasi 2               | Projected       | FHReD, 2015; Almeida et al., 2019 |
| Peru    | Illapani                   | Projected       | FHReD, 2015; Almeida et al., 2019 |
| Peru    | Ina 65 88 90               | Projected       | FHReD, 2015; Almeida et al., 2019 |
| Peru    | Inambari                   | Projected       | FHReD, 2015; Almeida et al., 2019 |
| Peru    | La Virgen                  | In Construction | FHReD, 2015; Almeida et al., 2019 |
| Peru    | Las Orquideas              | Projected       | FHReD, 2015; Almeida et al., 2019 |
| Peru    | Las Joyas                  | Projected       | FHReD, 2015; Almeida et al., 2019 |
| Peru    | Lavasen Quishuar           | Projected       | FHReD, 2015; Almeida et al., 2019 |
| Peru    | Llata 1                    | Projected       | FHReD, 2015; Almeida et al., 2019 |
| Peru    | Llata 2                    | Projected       | FHReD, 2015; Almeida et al., 2019 |
| Peru    | Lorena                     | Projected       | FHReD, 2015; Almeida et al., 2019 |
| Peru    | Mainique                   | Projected       | FHReD, 2015; Almeida et al., 2019 |
| Peru    | Manseriche                 | Projected       | FHReD, 2015; Almeida et al., 2019 |
| Peru    | Mantaro 270                | Projected       | FHReD, 2015; Almeida et al., 2019 |
| Peru    | Mayo 1                     | Projected       | FHReD, 2015; Almeida et al., 2019 |
| Peru    | Mayo 2                     | Projected       | FHReD, 2015; Almeida et al., 2019 |
| Peru    | Mayo 4                     | Projected       | FHReD, 2015; Almeida et al., 2019 |
| Peru    | Mazan                      | Projected       | FHReD, 2015; Almeida et al., 2019 |
| Peru    | Naranjos 2                 | Projected       | FHReD, 2015; Almeida et al., 2019 |
| Peru    | Oreja De Perro             | Projected       | FHReD, 2015; Almeida et al., 2019 |
| Peru    | Oreja De Perro 1           | Projected       | FHReD, 2015; Almeida et al., 2019 |
| Peru    | Pacobamba                  | Projected       | FHReD, 2015; Almeida et al., 2019 |
| Peru    | Paquitzapango              | Projected       | FHReD, 2015; Almeida et al., 2019 |
| Peru    | Pataz 1                    | Projected       | FHReD, 2015; Almeida et al., 2019 |
| Peru    | Pataz 2                    | Projected       | FHReD, 2015; Almeida et al., 2019 |
| Peru    | Pauya Cushabatay           | Projected       | FHReD, 2015; Almeida et al., 2019 |
| Peru    | Pias 2                     | Projected       | FHReD, 2015; Almeida et al., 2019 |
| Peru    | Pion                       | Projected       | FHReD, 2015; Almeida et al., 2019 |
| Peru    | Pongo De Aguirre           | Projected       | FHReD, 2015; Almeida et al., 2019 |
| Peru    | Pongo De Mainique Urub 320 | Projected       | FHReD, 2015; Almeida et al., 2019 |
| Peru    | Pucara 2                   | Projected       | FHReD, 2015; Almeida et al., 2019 |
| Peru    | Pucara Salcca              | Projected       | FHReD, 2015; Almeida et al., 2019 |
| Peru    | Puchca                     | Projected       | FHReD, 2015; Almeida et al., 2019 |
| Peru    | Pulperia                   | Projected       | FHReD, 2015; Almeida et al., 2019 |
| Peru    | Pumayacu Cachiyacu         | Projected       | FHReD, 2015; Almeida et al., 2019 |
| Peru    | Renovandes H1              | Projected       | FHReD, 2015; Almeida et al., 2019 |
| Peru    | Rentema                    | Projected       | FHReD, 2015; Almeida et al., 2019 |
| Peru    | Retamal                    | Projected       | FHReD, 2015; Almeida et al., 2019 |
| Peru    | Rio Araza                  | Projected       | FHReD, 2015; Almeida et al., 2019 |

| COUNTRY   | NAME                  | PHASE           | SOURCE                            |
|-----------|-----------------------|-----------------|-----------------------------------|
| Peru      | Rio Queros            | Projected       | FHReD, 2015; Almeida et al., 2019 |
| Peru      | Rupac                 | Projected       | FHReD, 2015; Almeida et al., 2019 |
| Peru      | San Gaban 3           | Projected       | FHReD, 2015; Almeida et al., 2019 |
| Peru      | San Pablo             | Projected       | FHReD, 2015; Almeida et al., 2019 |
| Peru      | Sandia Ina 30 Ina 40  | Projected       | FHReD, 2015; Almeida et al., 2019 |
| Peru      | San Gaban 4           | Projected       | FHReD, 2015; Almeida et al., 2019 |
| Peru      | Santa Catalina        | Projected       | FHReD, 2015; Almeida et al., 2019 |
| Peru      | Santa Maria           | Projected       | FHReD, 2015; Almeida et al., 2019 |
| Peru      | Santa Rosa Peru       | Projected       | FHReD, 2015; Almeida et al., 2019 |
| Peru      | Santa Teresa          | Projected       | FHReD, 2015; Almeida et al., 2019 |
| Peru      | Mages Siguas II       | In Construction | FHReD, 2015                       |
| Peru      | Molloco               | In Construction | FHReD, 2015                       |
| Peru      | Moquegua              | Projected       | FHReD, 2015                       |
| Peru      | Moquegua 1            | Projected       | FHReD, 2015                       |
| Peru      | Pucara                | In Construction | FHReD, 2015                       |
| Peru      | Santa Teresa II       | Projected       | FHReD, 2015; Almeida et al., 2019 |
| Peru      | Sausa Huarangalle     | Projected       | FHReD, 2015; Almeida et al., 2019 |
| Peru      | Sumabeni              | Projected       | FHReD, 2015; Almeida et al., 2019 |
| Peru      | Tambo 40              | Projected       | FHReD, 2015; Almeida et al., 2019 |
| Peru      | Tambo 60              | Projected       | FHReD, 2015; Almeida et al., 2019 |
| Peru      | Tambo Puerto Prado    | Projected       | FHReD, 2015; Almeida et al., 2019 |
| Peru      | Tulpac Palenque Pusac | Projected       | FHReD, 2015; Almeida et al., 2019 |
| Peru      | Velille               | Projected       | FHReD, 2015; Almeida et al., 2019 |
| Peru      | Tambo 1               | Projected       | FHReD, 2015                       |
| Peru      | Veracruz              | Projected       | FHReD, 2015; Almeida et al., 2019 |
| Peru      | Vilcanota 4           | Projected       | FHReD, 2015; Almeida et al., 2019 |
| Peru      | Vilcanota 5           | Projected       | FHReD, 2015; Almeida et al., 2019 |
| Peru      | Vizcatan              | Projected       | FHReD, 2015; Almeida et al., 2019 |
| Peru      | Yanamayo              | Projected       | FHReD, 2015; Almeida et al., 2019 |
| Peru      | Yangas                | Projected       | FHReD, 2015; Almeida et al., 2019 |
| Venezuela | Aripichi              | Projected       | FHReD, 2015                       |
| Venezuela | Auraima               | Projected       | FHReD, 2015                       |
| Venezuela | Chorrin               | Projected       | FHReD, 2015                       |
| Venezuela | Desarrollo            | Projected       | FHReD, 2015                       |
| Venezuela | El Infierno           | Projected       | FHReD, 2015                       |
| Venezuela | Eutobarima            | Projected       | FHReD, 2015                       |
| Venezuela | Tocoma                | Projected       | FHReD, 2015                       |

**Sources:**

*Almeida et al., 2268*

Almeida, R. M., Shi, Q., Gomes-Selman, J. M., Wu, X., Xue, Y., Angarita, H., Barros, N., Forsberg, B. R., García-Villacorta, R., Hamilton, S. K., Melack, J. M., Montoya, M., Perez, G., Sethi, S. A., Gomes, C. P. and Flecker, A. S.: Reducing greenhouse gas emissions of Amazon hydropower with strategic dam planning, *Nat. Commun.*, 10(1), doi:10.1038/s41467-019-12179-5, 2019

*ANEEL,2020:*

Agencia Nacional de Energia Eletrica (2020) Informações de Geração - ANEEL. Available at: <https://www.aneel.gov.br/siga> (Accessed: 02 November 2020).

*FHReD,2015:*

Zarfl, C. et al. (2014) 'A global boom in hydropower dam construction', *Aquatic Sciences*, 77(1), pp. 161–170. doi: 10.1007/s00027-014-0377-0.
